# Supplementary material for: Os supratrochleare anterius: a very rare clinical case and review of literature
Source: Research Square preprint supplement (doi:10.21203/rs.3.rs-3948540/v1), 2024-02-15
Supplement: Supplementary file 1 [file 22c9e5228b530f974734b6d8.xlsx]

## Sheet: Clinical cases
Author	Year	Sex	Age	Population	Laterality	Side	History	History of trauma	Symptoms	Diagnosis	Treatment	Dimensions	Shape	Follow up	Used term	Notes
Holyoke (cited by Simril and Trotter)	1947 (1949)	male	?	USA, negro	unilateral	?	cadaver	?	?	?	?	?	?	?	?	x
Simril and Trotter	1949	male	65	USA, negro	bilateral	left - bilateral	cadaver	not known	elbow joints in semiflexion and resisting extension beyond 135°	dissection, X-ray (L only)	none	24 mm tranverse x 6 mm AP	oblong	none	os cubiti anterius	arthritic change; long and narrow olecranon process; olecranon fossa presenting a transverse ridge of bone
Simril and Trotter	1949	male	65	USA, negro	bilateral	right - bilateral	cadaver	not known	elbow joints in semiflexion and resisting extension beyond 135°	dissection, X-ray (L only)	none	14 mm tranverse x 8 mm AP	oval	none	os cubiti anterius	arthritic change; long and narrow olecranon process; olecranon fossa presenting a transverse ridge of bone
Schwarz	1957	female	37	USA, white	bilateral	left - bilateral	poliomyelitis, palsy of the left ulnar nerve due to using crutches	suspect but not confirmed dislocation	no symptoms linekd to the bone presence	X-ray (AP,L) - moderate degree of osteoarthritis	none	6 x 11 mm	sharply delineated ovoid	3 years - without problems	antecubital bone; antecubital ossicle; fabella cubiti	x
Schwarz	1957	female	37	USA, white	bilateral	right - bilateral	poliomyelitis	not known	no symptoms linekd to the bone presence	X-ray (AP,L) - moderate degree of osteoarthritis	none	6 x 11 mm	sharply delineated ovoid	3 years - without problems	antecubital bone; antecubital ossicle; fabella cubiti	right side - accessory coronoid ossicle
Birkner (cited by Schwarz)	1957	?	?	?	?	?	?	?	?	?	?	?	?	?	?	x
Birkner (cited by Schwarz)	1957	?	?	?	?	?	?	?	?	?	?	?	?	?	?	x
Ochsenschläger	1959	female	28	Germany	unilateral	left	24 years	no	pain, blocking symptoms, impossible extension over 165°	X-ray (AP,L) - 2 pieces	none	?	round + oval	none (she refused surgical treatment)	none (considered a pathological ossicle after aseptic necrosis of bony septum)	severe arthrotic changes, supratrochlear foramen - the author considered it as of Stage III of the bon septum aseptic necrosis
Gudmundsen and Østsensen	1987	male	20	Norway	bilateral	right - bilateral	7 years	minor trauma after 7 years	increasing pain and limitation of motion	X-ray but not presented in the article	none	?	three additional bony particles in the fossa coronoidea	repeated trauma, planned surgery, not performed, X-ray revealed another accessory ossicle in the olecranon fossa (X-ray not present)		small bone-structured particle at the radial condyle of his right humerus (not visible on X-ray)
Gudmundsen and Østsensen	1987	male	20	Norway	bilateral	left - bilateral	6 years	no	?	X-ray (AP,L) - low quality	surgical removal	21 mm	?	?	os supratrochleare anterius	os supracondylare posterius
Gudmundsen and Østsensen	1987	male	17	Norway	unilateral	right	1 year	minor trauma 1 year ahead	increasing pain and limitations of motion	X-ray (AP,L) - low quality	surgical removal	?	oval	no problems	os supratrochleare anterius	small ossicles in both the fossa olecrani and the fossa coronoidea
Gudmundsen and Østsensen	1987	male	67	Norway	unilateral	right	20 years	no	pain and disturbed motion	X-ray - not present	no data	?	?	?	os supratrochleare anterius	large ossicle in the fossa coronoidea and two minor ossicles in the fossa olecrani
Kachlik et al.	2021	male	36	Czechia	unilateral	right	30 years	minor trauma 18 years ahead	chronic blocking and 20° limited flexion	X-ray (AP,L), CT	surgical removal	14 mm x 17 mm x 14 mm	oval and pyramidal	3 month without problems	os supratrochleare anterius	x
